# Supplementary material for: Glutamine Antagonist GA-607 Causes a Dramatic Accumulation of FGAR which can be used to Monitor Target Engagement
Source: PubMed Central journal article supplement — Curr Drug Metab. 2021 Aug 31;22(9):735–45. doi: 10.2174/1389200222666210831125041 (PMC8684803; doi:10.2174/1389200222666210831125041), 2021-08-31
Supplement: NIHMS1757677-supplement-Supplement_Figs.pdf [file NIHMS1757677-supplement-Supplement_Figs.pdf]

## Supplementary Material

## Glutamine Antagonist GA-607 Causes a Dramatic Accumulation of FGAR which can be Used to Monitor Target Engagement

Jesse Alt<sup>1</sup>, Sadakatali S. Gori<sup>1,2</sup>, Kathryn M. Lemberg<sup>1,3</sup>, Arindom Pal<sup>1,2</sup>, Vijayabhaskar Veeravalli<sup>8</sup>, Ying Wu<sup>1</sup>, Joanna Marie H. Aguilar<sup>1</sup>, Ranjeet P. Dash<sup>1,2</sup>, Lukáš Tenora<sup>9</sup>, Pavel Majer<sup>9</sup>, Qi Sun<sup>10</sup>, Barbara S. Slusher<sup>1,2,3,4,5,6,7,\*</sup> and Rana Rais<sup>1,2,7</sup>

<sup>1</sup>Johns Hopkins Drug Discovery, Department of <sup>2</sup>Neurology, <sup>3</sup>Oncology, <sup>4</sup>Psychiatry, <sup>5</sup>Neuroscience, <sup>6</sup>Medicine, <sup>7</sup>Pharmacology and Molecular Sciences, Johns Hopkins School of Medicine, Baltimore MD 21205, USA; <sup>8</sup>Drug Metabolism, Covance Laboratories Inc., Madison, WI 53704, USA; <sup>9</sup>Institute of Organic Chemistry and Biochemistry, Academy of Sciences of the Czech Republic v.v.i., Prague, 166 10, Czech Republic; <sup>10</sup>Jiangxi Science and Technology Normal University Nanchang, Jiangxi 330013, PR China

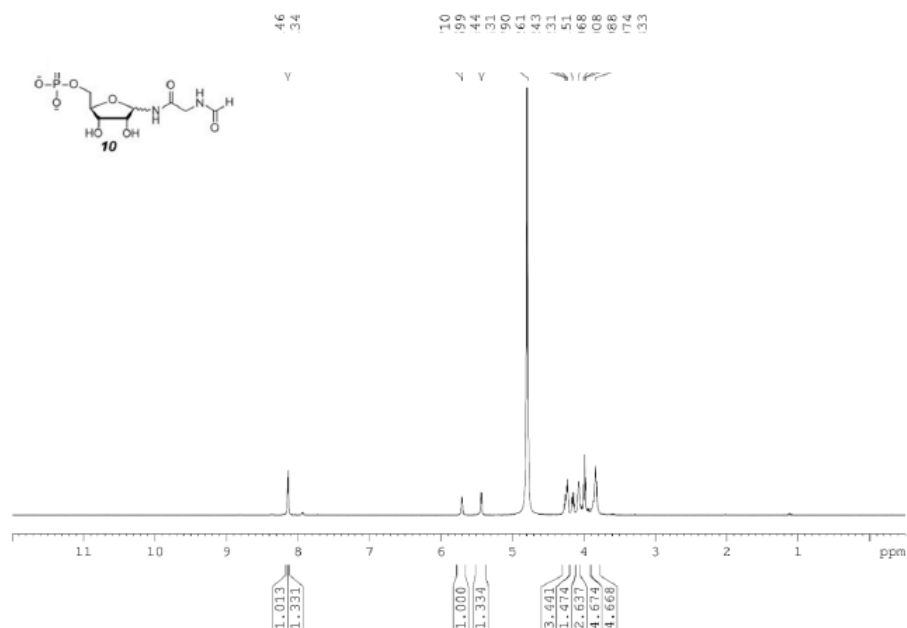

Fig. (S1). <sup>1</sup>H NMR spectrum of FGAR.

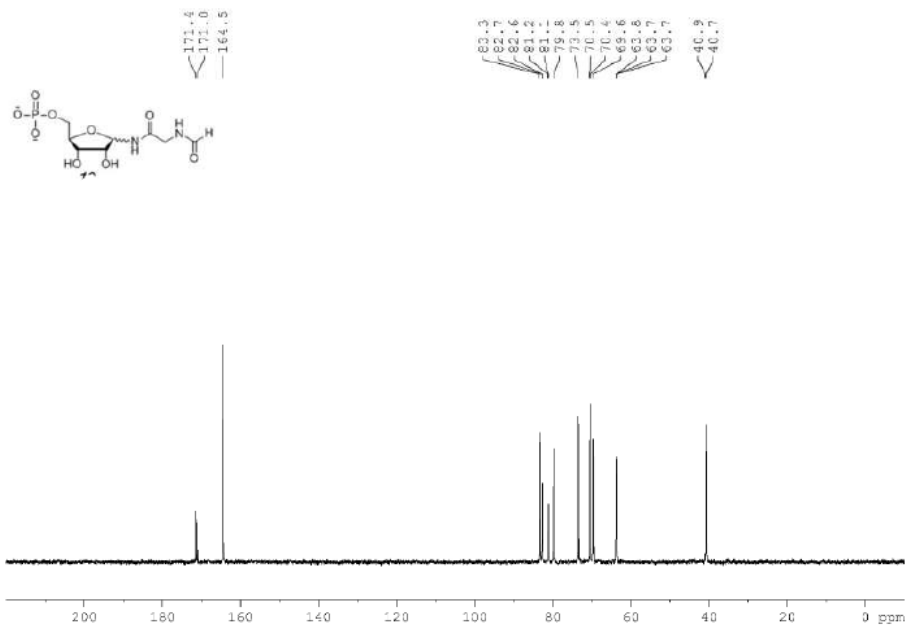

Fig. (S2). <sup>13</sup>C NMR spectrum of FGAR.

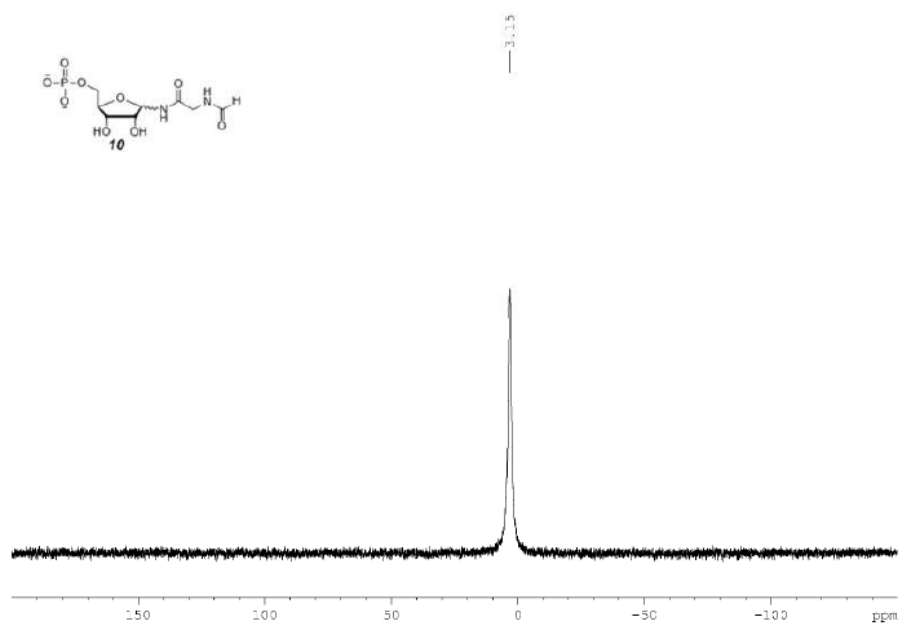**Fig. (S3).** <sup>31</sup>P NMR spectrum of FGAR.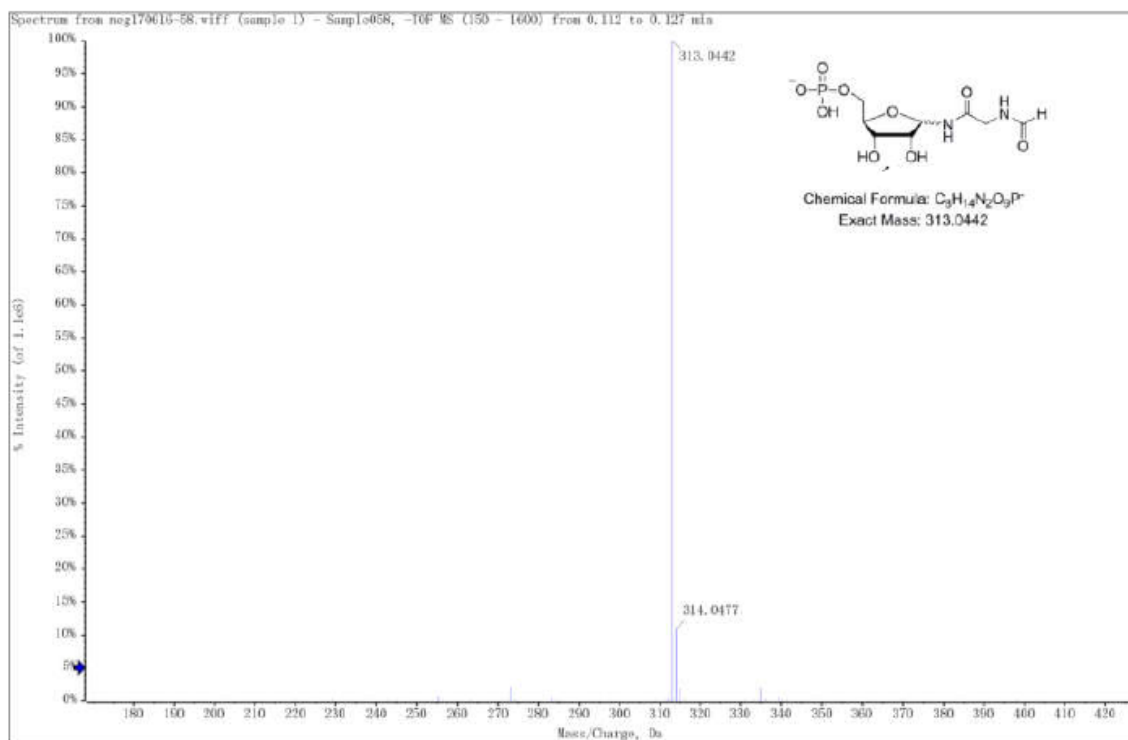**Fig. (S4).** ESI-HRMS<sup>(-)</sup> spectrum of FGAR.
